# Supplementary material for: Global database and model on dissolved carbon in soil solution
Source: Copernicus journal article supplement (doi:10.5194/bg-2019-238), 2019-07-01
Supplement: Supplementary file 1 [file bg-2019-238-supplement.zip]

## References

- Aitkenhead, J.A., McDowell, W.H., 2000. Soil C: N ratio as a predictor of annual riverine DOC flux at local and global scales. *Global Biogeochemical Cycles* 14, 127–138.
- Aitkenhead-Peterson, J.A., 2000. Source, production and export of dissolved organic carbon and nitrogen .
- Aitkenhead-Peterson, J.A., McDowell, W.H., Neff, J.C., 2003. Sources, production, and regulation of allochthonous dissolved organic matter inputs to surface waters, in: *Aquatic Ecosystems*. Elsevier, pp. 25–70.
- Aitkenhead-Peterson, J.A., Alexander, J.E., Clair, T.A., 2005. Dissolved organic carbon and dissolved organic nitrogen export from forested watersheds in Nova Scotia: Identifying controlling factors. *Global Biogeochemical Cycles* 19.
- Antweiler, R.C., Drever, J.I., 1983. The weathering of a late Tertiary volcanic ash: importance of organic solutes. *Geochimica et Cosmochimica Acta* 47, 623–629.
- Armstrong, A., Holden, J., Kay, P., Francis, B., Foulger, M., Gledhill, S., McDonald, A.T., Walker, A., 2010. The impact of peatland drain-blocking on dissolved organic carbon loss and discolouration of water; results from a national survey. *Journal of Hydrology* 381, 112–120.
- Arthur, M.A., Fahey, T.J., 1993. Controls on soil solution chemistry in a subalpine forest in north-central Colorado. *Soil Science Society of America Journal* 57, 1122–1130.
- Baeumler, R., Zech, W., 1998. Soil solution chemistry and impact of forest thinning in mountain forests in the Bavarian Alps. *Forest Ecology and Management* 108, 231–238.
- Berggren, D., Bergkvist, B., Johansson, M.B., Melkerud, P.A., Nilsson, A., Olsson, M., Langvall, O., Majdi, H., Weslien, P., 2004. A description of LUSTRA's common field sites. Technical Report.
- Bergkvist, B.O., Folkeson, L., 1992. Soil acidification and element fluxes of a *Fagus sylvatica* forest as influenced by simulated nitrogen deposition. *Water, Air, and Soil Pollution* 65, 111–133.

- Bockheim, J.G., Langley-Turnbaugh, S., 1997. Biogeochemical cycling in coniferous ecosystems on different aged marine terraces in coastal Oregon. *Journal of environmental quality* 26, 292–301.
- Borken, W., Ahrens, B., Schulz, C., Zimmermann, L., 2011. Site-to-site variability and temporal trends of DOC concentrations and fluxes in temperate forest soils. *Global change biology* 17, 2428–2443.
- Brooks, P.D., McKnight, D.M., Bencala, K.E., 1999. The relationship between soil heterotrophic activity, soil dissolved organic carbon (DOC) leachate, and catchment-scale DOC export in headwater catchments. *Water Resources Research* 35, 1895–1902.
- Byrne, K.A., Farrell, E.P., 2005. The effect of afforestation on soil carbon dioxide emissions in blanket peatland in Ireland. *Forestry* 78, 217–227.
- Chambers, J.Q., Tribuzy, E.S., Toledo, L.C., Crispim, B.F., Higuchi, N., dos Santos, J., Araújo, A.C., Kruijt, B., Nobre, A.D., Trumbore, S.E., 2004. Respiration from a tropical forest ecosystem: partitioning of sources and low carbon use efficiency. *Ecological Applications* 14, 72–88.
- Christ, M., David, M.B., 1994. Fractionation of dissolved organic carbon in soil water: effects of extraction and storage methods. *Communications in Soil Science & Plant Analysis* 25, 3305–3319.
- Clarkson, B.R., Schipper, L.A., Lehmann, A., 2004. Vegetation and peat characteristics in the development of lowland restiad peat bogs, North Island, New Zealand. *Wetlands* 24, 133–151.
- Cronan, C.S., 1985. Comparative effects of precipitation acidity on three forest soils: carbon cycling responses. *Plant and Soil* 88, 101–112.
- Cummins, T., Harrington, F., Neville, P., 2011. Forest health and ecosystem monitoring in Ireland, 2009: FutMon Project, further development and implementation of an EU-Level forest monitoring system, project number LIFE07 ENV/D/000218. Technical Report.
- Currie, W.S., Aber, J.D., McDowell, W.H., Boone, R.D., Magill, A.H., 1996. Vertical transport of dissolved organic C and N under long-term N amendments in pine and hardwood forests. *Biogeochemistry* 35, 471–505.

- Dalva, M., Moore, T.R., 1991. Sources and sinks of dissolved organic carbon in a forested swamp catchment. *Biogeochemistry* 15, 1–19.
- David, M., Vance, G., Kahl, J., 1999. Chemistry of Dissolved Organic Carbon at Bear Brook Watershed, Maine: Stream Water Response to  $(\text{NH}_4)_2\text{SO}_4$  Additions. *Environmental Monitoring and Assessment* 55, 149.
- David, M.B., Driscoll, C.T., 1984. Aluminum speciation and equilibria in soil solutions of a Haplorthod in the Adirondack Mountains (New York, USA). *Geoderma* 33, 297–318.
- Davidson, E.A., Verchot, L.V., Cattanio, J.H., Ackerman, I.L., Carvalho, J.E.M., 2000. Effects of soil water content on soil respiration in forests and cattle pastures of eastern Amazonia. *Biogeochemistry* 48, 53–69.
- Dawson, H.J., Ugolini, F.C., Hrutford, B.F., Zachara, J., 1978. Role of soluble organics in the soil processes of a podzol, Central Cascades, Washington. *Soil Science* 126, 290–296.
- De Wit, H.A., Mulder, J., Hindar, A., Hole, L., 2007. Long-term increase in dissolved organic carbon in streamwaters in Norway is response to reduced acid deposition. *Environmental Science & Technology* 41, 7706–7713.
- Don, A., Schulze, E.D., 2008. Controls on fluxes and export of dissolved organic carbon in grasslands with contrasting soil types. *Biogeochemistry* 91, 117–131.
- Dosskey, M.G., Bertsch, P.M., 1997. Transport of dissolved organic matter through a sandy forest soil. *Soil Science Society of America Journal* 61, 920–927.
- Easthouse, K.B., Mulder, J., Christophersen, N., Seip, H.M., 1992. Dissolved organic carbon fractions in soil and stream water during variable hydrological conditions at Birkenes, southern Norway. *Water resources research* 28, 1585–1596.
- Edmonds, R.L., Thomas, T.B., Rhodes, J.J., 1991. Canopy and soil modification of precipitation chemistry in a temperate rain forest. *Soil Science Society of America Journal* 55, 1685–1693.

- Fellman, J.B., D'Amore, D.V., Hood, E., Boone, R.D., 2008. Fluorescence characteristics and biodegradability of dissolved organic matter in forest and wetland soils from coastal temperate watersheds in southeast Alaska. *Biogeochemistry* 88, 169–184.
- Fernandez, I.J., Lawrence, G.B., Son, Y., 1995. Soil-solution chemistry in a low-elevation spruce-fir ecosystem, Howland, Maine. *Water, Air, and Soil Pollution* 84, 129–145.
- Fernández-Sanjurjo, M.J., Vega, V.F., Garcia-Rodeja, E., 1997. Atmospheric deposition and ionic concentration in soils under pine and deciduous forests in the river Sor catchment (Galicia, NW Spain). *Science of the total environment* 204, 125–134.
- Fiebig, D.M., Lock, M.A., Neal, C., 1990. Soil water in the riparian zone as a source of carbon for a headwater stream. *Journal of Hydrology* 116, 217–237.
- Freeman, C., Fenner, N., Ostle, N.J., Kang, H., Dowrick, D.J., Reynolds, B., Lock, M.A., Sleep, D., Hughes, S., Hudson, J., 2004. Export of dissolved organic carbon from peatlands under elevated carbon dioxide levels. *Nature* 430, 195.
- Fröberg, M., Berggren, D., Bergkvist, B., Bryant, C., Mulder, J., 2006. Concentration and fluxes of dissolved organic carbon (DOC) in three Norway spruce stands along a climatic gradient in Sweden. *Biogeochemistry* 77, 1–23.
- Fröberg, M., Hansson, K., Kleja, D.B., Alavi, G., 2011. Dissolved organic carbon and nitrogen leaching from Scots pine, Norway spruce and silver birch stands in southern Sweden. *Forest ecology and management* 262, 1742–1747.
- Fujii, K., Hartono, A., Funakawa, S., Uemura, M., Kosaki, T., 2011. Acidification of tropical forest soils derived from serpentine and sedimentary rocks in East Kalimantan, Indonesia. *Geoderma* 160, 311–323.
- Gallardo, L., González, H., 2004. Sequestration of carbon in Spanish deciduous oak forests. *Advances in GeoEcology* , 341–351.

- Gallardo-Lancho, J.F., 2000. Biogeochemistry of Mediterranean Forest Ecosystems. *Soil biochemistry* 10, 423.
- Geary, R.J., Driscoll, C.T., 1996. Forest soil solutions: acid/base chemistry and response to calcite treatment, in: *Experimental Watershed Liming Study*. Springer, pp. 53–78.
- Gielen, B., Neiryneck, J., Luyssaert, S., Janssens, I.A., 2011. The importance of dissolved organic carbon fluxes for the carbon balance of a temperate Scots pine forest. *Agricultural and Forest Meteorology* 151, 270–278.
- Glatzel, S., Kalbitz, K., Dalva, M., Moore, T., 2003. Dissolved organic matter properties and their relationship to carbon dioxide efflux from restored peat bogs. *Geoderma* 113, 397–411.
- Goller, R., Wilcke, W., Fleischbein, K., Valarezo, C., Zech, W., 2006. Dissolved nitrogen, phosphorus, and sulfur forms in the ecosystem fluxes of a montane forest in Ecuador. *Biogeochemistry* 77, 57–89.
- Grieve, I.C., 1990a. Soil and soil solution chemical composition at three sites within the Loch Dee catchment, SW Scotland. *European Journal of Soil Science* 41, 269–277.
- Grieve, I.C., 1990b. Variations in chemical composition of the soil solution over a four-year period at an upland site in southwest Scotland. *Geoderma* 46, 351–362.
- Guggenberger, G., 1992. Eigenschaften und Dynamik gelöster organischer Substanzen (DOM) auf unterschiedlich immissionsbelasteten Fichtenstandorten. *Lehrstuhl für Bodenkunde und Bodengeographie der Univ.*
- Gundersen, P., Emmett, B.A., Kjønaas, O.J., Koopmans, C.J., Tietema, A., 1998. Impact of nitrogen deposition on nitrogen cycling in forests: a synthesis of NITREX data. *Forest Ecology and management* 101, 37–55.
- Hafkenscheid, R.L.L.J., 2000. Hydrology and biogeochemistry of tropical montane rain forests of contrasting stature in the Blue Mountains, Jamaica.
- Hagedorn, F., Schleppi, P., Waldner, P., Flühler, H., 2000. Export of dissolved organic carbon and nitrogen from Gleysol dominated catchments—the significance of water flow paths. *Biogeochemistry* 50, 137–161.

- Hansson, K., Olsson, B.A., Olsson, M., Johansson, U., Kleja, D.B., 2011. Differences in soil properties in adjacent stands of Scots pine, Norway spruce and silver birch in SW Sweden. *Forest Ecology and Management* 262, 522–530.
- Harrison, A.F., Taylor, K., Scott, A., Poskitt, J.A.N., Benham, D., Grace, J., Chaplow, J., Rowland, P., 2008. Potential effects of climate change on DOC release from three different soil types on the Northern Pennines UK: examination using field manipulation experiments. *Global Change Biology* 14, 687–702.
- Hentschel, K., Borken, W., Zuber, T., Bogner, C., Huwe, B., Matzner, E., 2009. Effects of soil frost on nitrogen net mineralization, soil solution chemistry and seepage losses in a temperate forest soil. *Global Change Biology* 15, 825–836.
- Jiao, Y., Xu, Z., Zhao, J., 2009. Effects of grassland conversion to cropland and forest on soil organic carbon and dissolved organic carbon in the farming-pastoral ecotone of Inner Mongolia. *Acta Ecologica Sinica* 29, 150–154.
- Johnson, M.S., Lehmann, J., Couto, E.G., Novaes Filho, J.P., Riha, S.J., 2006. DOC and DIC in flowpaths of Amazonian headwater catchments with hydrologically contrasting soils. *Biogeochemistry* 81, 45–57.
- Justine, M.F., Yang, W., Wu, F., Tan, B., Naeem Khan, M., Li, Z., 2017. Dissolved organic matter in soils varies across a chronosequence of *Pinus massoniana* plantations. *Ecosphere* 8, e01764.
- Kang, H., Freeman, C., Ashendon, T.W., 2001. Effects of elevated CO<sub>2</sub> on fen peat biogeochemistry. *Science of the Total Environment* 279, 45–50.
- Kindler, R., Siemens, J.A.N., Kaiser, K., Walmsley, D.C., Bernhofer, C., Buchmann, N., Cellier, P., Eugster, W., Gleixner, G., GRÜNWALD, T., 2011. Dissolved carbon leaching from soil is a crucial component of the net ecosystem carbon balance. *Global Change Biology* 17, 1167–1185.
- K'O H, D., David, M.B., Vance, G.F., 1996. Characterization of solid and dissolved carbon in a spruce-fir Spodosol. *Biogeochemistry* 35, 339–365.

- Koprivnjak, J.F., Moore, T.R., 1992. Sources, sinks, and fluxes of dissolved organic carbon in subarctic fen catchments. *Arctic and Alpine Research* 24, 204–210.
- Krám, P., Hruška, J., Wenner, B.S., Discoll, C.T., Johnson, C.E., 1997. The biogeochemistry of basic cations in two forest catchments with contrasting lithology in the Czech Republic. *Biogeochemistry* 37, 173–202.
- Kreutzer, K., 1995. Effects of forest liming on soil processes, in: *Nutrient Uptake and Cycling in Forest Ecosystems*. Springer, pp. 447–470.
- Lawrence, G.B., David, M.B., 1996. Chemical evaluation of soil-solution in acid forest soils. *Soil Science* 161, 298–313.
- Liechty, H.O., Kuuseoks, E., Mroz, G.D., 1995. Dissolved organic carbon in northern hardwood stands with differing acidic inputs and temperature regimes. *Journal of Environmental Quality* 24, 927–933.
- Litaor, M., 1987. The Influence of Eolian Dust on the Genesis of Alpine Soils in the Front Range, Colorado 1. *Soil Science Society of America Journal* 51, 142–147.
- Litaor, M.I., 1988. Soil solution chemistry in an alpine watershed, Front Range, Colorado, USA. *Arctic and Alpine Research* 20, 485–491.
- Liu, C.P., Sheu, B.H., 2003. Dissolved organic carbon in precipitation, throughfall, stemflow, soil solution, and stream water at the Guandaushi subtropical forest in Taiwan. *Forest Ecology and Management* 172, 315–325.
- Liu, E., Yan, C., Mei, X., Zhang, Y., Fan, T., 2013. Long-term effect of manure and fertilizer on soil organic carbon pools in dryland farming in northwest China. *Plos one* 8, e56536.
- Lu, X., Gilliam, F.S., Yu, G., Chen, H., Mo, J., 2013. Long-term nitrogen addition decreases carbon leaching in a nitrogen-rich forest ecosystem .
- MacLean, R., Oswood, M.W., Irons, J.G., McDowell, W.H., 1999. The effect of permafrost on stream biogeochemistry: a case study of two streams in the Alaskan (USA) taiga. *Biogeochemistry* 47, 239–267.

- Major, J., Lehmann, J., Rondon, M., Goodale, C., 2010. Fate of soil-applied black carbon: downward migration, leaching and soil respiration. *Global Change Biology* 16, 1366–1379.
- Marin, L.E., Kratz, T.K., Bowser, C.J., 1990. Spatial and temporal patterns in the hydrogeochemistry of a poor fen in northern Wisconsin. *Biogeochemistry* 11, 63–76.
- Markewitz, D., Davidson, E., Moutinho, P., Nepstad, D., 2004. Nutrient loss and redistribution after forest clearing on a highly weathered soil in Amazonia. *Ecological Applications* 14, 177–199.
- Markewitz, D., Davidson, E.A., Figueiredo, R.d.O., Victoria, R.L., Krusche, A.V., 2001. Control of cation concentrations in stream waters by surface soil processes in an Amazonian watershed. *Nature* 410, 802.
- Marques, R., Ranger, J., 1997. Nutrient dynamics in a chronosequence of Douglas-fir (*Pseudotsuga menziesii* (Mirb.) Franco) stands on the Beaujolais Mounts (France). 1: Qualitative approach. *Forest Ecology and Management* 91, 255–277.
- McClain, M.E., Richey, J.E., Brandes, J.A., Pimentel, T.P., 1997. Dissolved organic matter and terrestrial-lotic linkages in the central Amazon basin of Brazil. *Global Biogeochemical Cycles* 11, 295–311.
- McDowell, W.H., 1998. Internal nutrient fluxes in a Puerto Rican rain forest. *Journal of Tropical Ecology* 14, 521–536.
- McDowell, W.H., Currie, W.S., Aber, J.D., Yang, Y., 1998. Effects of chronic nitrogen amendments on production of dissolved organic carbon and nitrogen in forest soils, in: *Biogeochemical Investigations at Watershed, Landscape, and Regional Scales*. Springer, pp. 175–182.
- McDowell, W.H., Likens, G.E., 1988. Origin, composition, and flux of dissolved organic carbon in the Hubbard Brook Valley. *Ecological monographs* 58, 177–195.
- McDowell, W.H., Wood, T., 1984. Soil processes control dissolved organic carbon concentration in stream water. *Soil Sci* 137, 23–32.



- McLaughlin, J.W., Liu, G., Jurgensen, M.F., Gale, M.R., 1996. Organic carbon characteristics in a spruce swamp five years after harvesting. *Soil Science Society of America Journal* 60, 1228–1236.
- Medina, E., Klinge, H., Jordan, C., Herrera, R., 1980. Soil respiration in Amazonian rain forests in the Rio Negro Basin. *Flora* 170, 240–250.
- Meir, P., Malhi, Y., Hodnett, M., Grace, J., 2004. Soil CO<sub>2</sub> efflux in a tropical forest in the central Amazon. *Global Change Biology* 10, 601–617.
- Michalzik, B., Kalbitz, K., Park, J.H., Solinger, S., Matzner, E., 2001. Fluxes and concentrations of dissolved organic carbon and nitrogen—a synthesis for temperate forests. *Biogeochemistry* 52, 173–205.
- Michalzik, B., Matzner, E., 1999. Dynamics of dissolved organic nitrogen and carbon in a Central European Norway spruce ecosystem. *European journal of soil science* 50, 579–590.
- Michalzik, B., Tipping, E., Mulder, J., Lancho, J.F.G., Matzner, E., Bryant, C.L., Clarke, N., Loftis, S., Esteban, M.A.V., 2003. Modelling the production and transport of dissolved organic carbon in forest soils. *Biogeochemistry* 66, 241–264.
- Miller, J.D., Anderson, H.A., Ferrier, R.C., Walker, T.A.B., 1990. Hydrochemical fluxes and their effects on stream acidity in two forested catchments in central Scotland. *Forestry: An International Journal of Forest Research* 63, 311–331.
- Möller, A., 2001. Soil organic Matter and organic nutrient transformation in soils of the highlands of Northern Thailand. *Lehrstuhl für Bodenkunde und Bodengeographie der Univ.*
- Möller, A., Kaiser, K., Guggenberger, G., 2005. Dissolved organic carbon and nitrogen in precipitation, throughfall, soil solution, and stream water of the tropical highlands in northern Thailand. *Journal of Plant Nutrition and Soil Science* 168, 649–659.
- Moore, T.R., 1988. Dissolved iron and organic matter in northern peatlands. *Soil Science* 145, 70–76.

- Moore, T.R., 1989. Dynamics of dissolved organic carbon in forested and disturbed catchments, Westland, New Zealand: 1. Maimai. *Water Resources Research* 25, 1321–1330.
- Moore, T.R., Clarkson, B.R., 2007. Dissolved organic carbon in New Zealand peatlands .
- Moore, T.R., Jackson, R.J., 1989. Dynamics of dissolved organic carbon in forested and disturbed catchments, Westland, New Zealand: 2. Larry River. *Water Resources Research* 25, 1331–1339.
- Moore, T.R., Paré, D., Boutin, R., 2008. Production of dissolved organic carbon in Canadian forest soils. *Ecosystems* 11, 740–751.
- Mulder, J., Clarke, N., 2000. Production and transport of organic solutes: effects of natural climate variation. EU PROTOS project Final Report .
- Neal, C., Robson, A.J., Neal, M., Reynolds, B., 2005. Dissolved organic carbon for upland acidic and acid sensitive catchments in mid-Wales. *Journal of Hydrology* 304, 203–220.
- Neff, J.C., Asner, G.P., 2001. Dissolved organic carbon in terrestrial ecosystems: synthesis and a model. *Ecosystems* 4, 29–48.
- Neu, V., Ward, N.D., Krusche, A.V., Neill, C., 2016. Dissolved organic and inorganic carbon flow paths in an Amazonian transitional forest. *Frontiers in Marine Science* 3, 114.
- Nielsen, K.E., Ladekarl, U.L., Nørnberg, P., 1999. Dynamic soil processes on heathland due to changes in vegetation to oak and Sitka spruce. *Forest Ecology and Management* 114, 107–116.
- Parfitt, R.L., Mackay, A.D., Ross, D.J., Budding, P.J., 2009. Effects of soil fertility on leaching losses of N, P and C in hill country. *New Zealand Journal of Agricultural Research* 52, 69–80.
- Peichl, M., Moore, T.R., Arain, M.A., Dalva, M., Brodkey, D., McLaren, J., 2007. Concentrations and fluxes of dissolved organic carbon in an age-sequence of white pine forests in Southern Ontario, Canada. *Biogeochemistry* 86, 1–17.

- Prescher, A.K., Grünwald, T., Bernhofer, C., 2010. Land use regulates carbon budgets in eastern Germany: From NEE to NBP. *Agricultural and Forest Meteorology* 150, 1016–1025.
- Qualls, R.G., Haines, B.L., 1991. Geochemistry of dissolved organic nutrients in water percolating through a forest ecosystem. *Soil Science Society of America Journal* 55, 1112–1123.
- Qualls, R.G., Haines, B.L., 1992. Biodegradability of dissolved organic matter in forest throughfall, soil solution, and stream water. *Soil Science Society of America Journal* 56, 578–586.
- Quideau, S.A., Bockheim, J.G., 1997. Biogeochemical cycling following planting to red pine on a sandy prairie soil. *Journal of environmental quality* 26, 1167–1175.
- Raastad, I.A., Mulder, J., 1999. Dissolved Organic Matter (DOM) in Acid Forest Soils at Gådsjön (Sweden): Natural Variabilities and Effects of Increased Input of Nitrogen and of Reversal of Acidification. *Water, Air, and Soil Pollution* 114, 199–219.
- Rebmann, C., Zeri, M., Lasslop, G., Mund, M., Kolle, O., Schulze, E.D., Feigenwinter, C., 2010. Treatment and assessment of the CO<sub>2</sub>-exchange at a complex forest site in Thuringia, Germany. *Agricultural and Forest Meteorology* 150, 684–691.
- Richter, D.D., Markewitz, D., 1996. Carbon changes during the growth of loblolly pine on formerly cultivated soil: The Calhoun Experimental Forest, USA, in: *Evaluation of Soil Organic Matter Models*. Springer, pp. 397–407.
- Richter, D.D., Markewitz, D., Dunsomb, J.K., Heine, P.R., Wells, C.G., Stuanes, A., Allen, H.L., Urrego, B., Harrison, K., Bonani, G., 1995. Carbon cycling in a loblolly pine forest: implications for the missing carbon sink and for the concept of soil. *Carbon forms and functions in forest soils* , 233–251.
- Robert, É.C., Rochefort, L., Garneau, M., 1999. Natural revegetation of two block-cut mined peatlands in eastern Canada. *Canadian Journal of Botany* 77, 447–459.

- Roose, E.J., Lelong, F., 1981. Factors of the chemical composition of seepage and groundwaters in the intertropical zone (West Africa). *Journal of Hydrology* 54, 1–22.
- Sanderman, J., 2007. The role of dissolved organic carbon in the terrestrial carbon cycle. University of California, Berkeley.
- Sanderman, J., Amundson, R., 2008. A comparative study of dissolved organic carbon transport and stabilization in California forest and grassland soils. *Biogeochemistry* 89, 309–327.
- Saurette, D.D., Chang, S.X., Thomas, B.R., 2006. Some characteristics of soil respiration in hybrid poplar plantations in northern Alberta. *Canadian journal of soil science* 86, 257–268.
- Sawicka, K., Monteith, D.T., Vanguelova, E.I., Wade, A.J., Clark, J.M., 2016. Fine-scale temporal characterization of trends in soil water dissolved organic carbon and potential drivers. *Ecological indicators* 68, 36–51.
- Schiff, S.L., Aravena, R., Trumbore, S.E., Dillon, P.J., 1990. Dissolved organic carbon cycling in forested watersheds: a carbon isotope approach. *Water Resources Research* 26, 2949–2957.
- Schrumpf, M., Zech, W., Lehmann, J., Lyaruu, H.V.C., 2006. TOC, TON, TOS and TOP in rainfall, throughfall, litter percolate and soil solution of a montane rainforest succession at Mt. Kilimanjaro, Tanzania. *Biogeochemistry* 78, 361–387.
- Schwendenmann, L., Veldkamp, E., 2005. The role of dissolved organic carbon, dissolved organic nitrogen, and dissolved inorganic nitrogen in a tropical wet forest ecosystem. *Ecosystems* 8, 339–351.
- Shibata, H., Mitsuhashi, H., Miyake, Y., Nakano, S., 2001. Dissolved and particulate carbon dynamics in a cool-temperate forested basin in northern Japan. *Hydrological Processes* 15, 1817–1828.
- Solinger, S., Kalbitz, K., Matzner, E., 2001. Controls on the dynamics of dissolved organic carbon and nitrogen in a Central European deciduous forest. *Biogeochemistry* 55, 327–349.

- Sollins, P., Grier, C.C., McCorison, F.M., Cromack Jr, K., Fogel, R., Fredriksen, R.L., 1980. The internal element cycles of an old-growth Douglas-fir ecosystem in western Oregon. *Ecological monographs* 50, 261–285.
- Sollins, P., McCorison, F.M., 1981. Nitrogen and carbon solution chemistry of an old growth coniferous forest watershed before and after cutting. *Water Resources Research* 17, 1409–1418.
- Sparling, G.P., Chibnall, E.J., Pronger, J., Rutledge, S., Wall, A.M., Campbell, D.I., Schipper, L.A., 2016. Estimates of annual leaching losses of dissolved organic carbon from pastures on Allophanic Soils grazed by dairy cattle, Waikato, New Zealand. *New Zealand Journal of Agricultural Research* 59, 32–49.
- Stevens, D.P., Cox, J.W., Chittleborough, D.J., 1999. Pathways of phosphorus, nitrogen, and carbon movement over and through texturally differentiated soils, South Australia. *Australian Journal of Soil Research* 37, 679.
- Stutter, M.I., Billett, M.F., 2003. Biogeochemical controls on streamwater and soil solution chemistry in a High Arctic environment. *Geoderma* 113, 127–146.
- Teklay, T., Chang, S.X., 2008. Temporal changes in soil carbon and nitrogen storage in a hybrid poplar chronosequence in northern Alberta. *Geoderma* 144, 613–619.
- Tipping, E., Woof, C., Rigg, E., Harrison, A.F., Ineson, P., Taylor, K., Benham, D., Poskitt, J., Rowland, A.P., Bol, R., 1999. Climatic influences on the leaching of dissolved organic matter from upland UK moorland soils, investigated by a field manipulation experiment. *Environment International* 25, 83–95.
- Ugolini, F.C., Minden, R., Dawson, H., Zachara, J., 1977. An example of soil processes in the *Abies amabilis* zone of Central Cascades, Washington. *Soil Science* 124, 291–302.
- UK Environmental Change Network (ECN), 2017. Data - Environmental Change Network. URL: <http://www.ecn.ac.uk/data>.

- Undurraga, P., Zagal, E., Sepúlveda, G., Valderrama, N., 2009. Dissolved organic carbon and nitrogen in Andisol for six crop rotations with different soil management intensity. *Chilean Journal of Agricultural Research* 69, 445–454.
- Van Seters, T.E., Price, J.S., 2001. The impact of peat harvesting and natural regeneration on the water balance of an abandoned cutover bog, Quebec. *Hydrological Processes* 15, 233–248.
- Wallage, Z.E., Holden, J., McDonald, A.T., 2006. Drain blocking: an effective treatment for reducing dissolved organic carbon loss and water discolouration in a drained peatland. *Science of the total environment* 367, 811–821.
- Williams, M.R., Fisher, T.R., Melack, J.M., 1997. Solute dynamics in soil water and groundwater in a central Amazon catchment undergoing deforestation. *Biogeochemistry* 38, 303–335.
- Yavitt, J.B., Fahey, T.J., 1986. Litter decay and leaching from the forest floor in *Pinus contorta* (lodgepole pine) ecosystems. *The Journal of Ecology* , 525–545.
- Zeeman, M.J., Hiller, R., Gilgen, A.K., Michna, P., Plüss, P., Buchmann, N., Eugster, W., 2010. Management and climate impacts on net CO<sub>2</sub> fluxes and carbon budgets of three grasslands along an elevational gradient in Switzerland. *Agricultural and Forest Meteorology* 150, 519–530.
