# Supplementary material for: Global database and model on dissolved carbon in soil solution
Source: Copernicus journal article supplement (doi:10.5194/bg-2019-238), 2019-07-01
Supplement: Supplementary file 2 [file bg-2019-238-supplement.zip]

#### Details statistical tests mentioned in the article

| # | Text (factors in bold)                                                                                                                                                                                                                                           | Normality?                                   | Which test                                                          | p-value                                                      | Remarks                                                                                  |
|---|------------------------------------------------------------------------------------------------------------------------------------------------------------------------------------------------------------------------------------------------------------------|----------------------------------------------|---------------------------------------------------------------------|--------------------------------------------------------------|------------------------------------------------------------------------------------------|
| 1 | <b>Laboratory experiments</b> yield significantly higher concentrations in both topsoils and subsoils <b>than other methods</b>                                                                                                                                  | No                                           | Mann-Whitney U                                                      | <u>Top</u> : 1.01e-07<br><u>Sub</u> : 2.082e-05              |                                                                                          |
| 2 | In subsoils, <b>piezometer-based concentrations</b> are much higher than <b>for other sampling methods</b>                                                                                                                                                       | No                                           | Mann-Whitney U                                                      | 9.234e-12                                                    | Excluded lab incubations                                                                 |
| 3 | found different concentrations between <b>zero-tension and tension lysimeters</b> (Sparling et al., 2016), we did not observe this in neither <b>top- or subsoil</b> data.                                                                                       | <u>Top</u> : possibly/yes<br><u>Sub</u> : no | <u>Top</u> : Mann-Whitney U & T-test<br><u>Sub</u> : Mann-Whitney U | <u>Top</u> : 0.1813 (MW-U), 0.138 (T)<br><u>Sub</u> : 0.1772 | For top, t-test might be acceptable                                                      |
| 4 | Values for <b>Histosols</b> <b>do not differ significantly compared to all topsoil data</b> , so can be included in a further topsoil data analysis.                                                                                                             | No                                           | Mann-Whitney U                                                      | 0.2237                                                       | Excluded lab incubations ; Tested for 'Peat' vs 'others', like in figure 6.              |
| 5 | Topsoils; <b>Also, oceanic climates</b> have higher values than <b>the three tropical climates</b> .                                                                                                                                                             | No                                           | Mann-Whitney U                                                      | 2.763e-05                                                    | Excluded lab incubations                                                                 |
| 6 | Topsoils; Where some studies identified different DOC concentrations between <b>coniferous and deciduous forests</b> (Currie et al., 1996; Fernández-Sanjurjo et al., 1997), this was not observed at the global scale, despite the large number of data entries | possibly/yes                                 | Mann-Whitney U & T-test                                             | <u>Top</u> : 0.2084 (MW-U), 0.2096 (T)                       | Excluded lab incubations ; t-test might be acceptable (though irrelevant as both >>0.05) |
